# Supplementary material for: Prognostic Utility of Risk Enhancers and Coronary Artery Calcium Score Recommended in the 2018 ACC/AHA Multisociety Cholesterol Treatment Guidelines Over the Pooled Cohort Equation: Insights From 3 Large Prospective Cohorts
Source: PubMed Central journal article supplement — J Am Heart Assoc. 2021 Jun 7;10(12):e019589. doi: 10.1161/JAHA.120.019589 (PMC8477885; doi:10.1161/jaha.120.019589), 2021-06-07
Supplement: JAH3-10-e019589-s001.pdf [file JAH3-10-e019589-s001.pdf]

# **SUPPLEMENTAL MATERIAL**

**Table S1. Baseline characteristics and distribution of risk enhancers, stratified by study cohort and risk categories.**

|                                        | ARIC<br>(n=12,906) |                |                | CHS<br>(n=3,626) |                |                | MESA<br>(n=6,410) |                |                |
|----------------------------------------|--------------------|----------------|----------------|------------------|----------------|----------------|-------------------|----------------|----------------|
|                                        | <7.5%              | 7.5 to<br><20% | ≥20%           | <7.5%            | 7.5 to<br><20% | ≥20%           | <7.5%             | 7.5 to<br><20% | ≥20%           |
| No. (%) by cohort                      | 9209<br>(71.4)     | 3016<br>(23.4) | 681<br>(5.3)   | 470<br>(13)      | 1860<br>(51.3) | 1296<br>(35.7) | 4220<br>(65.8)    | 1749<br>(27.3) | 441<br>(6.9)   |
| <b>Baseline characteristics</b>        |                    |                |                |                  |                |                |                   |                |                |
| Age, mean (SD), years                  | 52.8<br>(5.4)      | 57.1<br>(5.4)  | 57.7<br>(5.3)  | 67.2<br>(2.1)    | 70.1<br>(3.5)  | 73.1<br>(4.1)  | 58.1<br>(8.7)     | 66.9<br>(7.9)  | 70.5<br>(7.9)  |
| Female, %                              | 65.5               | 30.8           | 26.8           | 92.1             | 65             | 45.7           | 60.4              | 39.9           | 29.2           |
| White, %                               | 77.2               | 73.3           | 64.7           | 91.4             | 94.6           | 96.3           | 32.8              | 46.4           | 59.1           |
| African American, %                    | 22.8               | 26.7           | 35.2           | 6.0              | 5.1            | 3.6            | 24.6              | 34.6           | 34.7           |
| Total Cholesterol, mean<br>(SD), mg/dL | 208<br>(38.2)      | 226<br>(43.4)  | 234<br>(50.2)  | 207<br>(34.5)    | 213<br>(37)    | 215<br>(41.7)  | 192<br>(33.8)     | 195<br>(36.1)  | 199<br>(37.9)  |
| HDL-C, mean (SD),<br>mg/dL             | 56.0<br>(17.3)     | 43.8<br>(12.1) | 40.9<br>(11.3) | 66.9<br>(17.0)   | 55.9<br>(15.1) | 50.2<br>(13.4) | 52.8<br>(15.1)    | 48.1<br>(13.4) | 46.3<br>(13.1) |
| LDL-C, mean (SD), mg/dl                | 130<br>(35.8)      | 152<br>(40.2)  | 158<br>(46.1)  | 121<br>(32.4)    | 134<br>(33.9)  | 138<br>(37.7)  | 115<br>(30.6)     | 120<br>(32.6)  | 124<br>(33.9)  |
| Untreated SBP,<br>mean(SD), mmHg       | 114<br>(14)        | 128<br>(18)    | 146<br>(26)    | 116<br>(14)      | 130<br>(17)    | 145<br>(20)    | 116<br>(16)       | 132<br>(19)    | 147<br>(19)    |
| Treated SBP, mean (SD),<br>mmHg        | 122<br>(14)        | 133<br>(17)    | 147<br>(22)    | 116<br>(15)      | 130<br>(16)    | 149<br>(20)    | 125<br>(17)       | 138<br>(20)    | 153<br>(22)    |
| BP meds, %                             | 14.1               | 35.4           | 58.8           | 16.3             | 34.1           | 54.4           | 26.8              | 52.1           | 65.1           |
| Current smoker, %                      | 17.4               | 44.2           | 60.5           | 5.7              | 12.2           | 16.6           | 9.3               | 19.8           | 25.1           |
| Diabetes, %                            | 2.6                | 15.2           | 52.8           | 1.2              | 6.5            | 45.2           | 4.5               | 20.1           | 38.1           |
| Statin use, %                          | 0.40               | 0.56           | 0.44           | 4.8              | 1.1            | 0.54           | 16.4              | 12.9           | 4.1            |
| <b>Risk enhancers</b>                  |                    |                |                |                  |                |                |                   |                |                |
| Triglyceride≥175 mg/dL,<br>%           | 11.7               | 28.8           | 44.0           | 10.0             | 18.8           | 28.9           | 17.4              | 23.3           | 26.3           |

|                                    |      |      |      |      |      |      |      |      |      |
|------------------------------------|------|------|------|------|------|------|------|------|------|
| LDL-C≥160 mg/dL, %                 | 19.6 | 40.0 | 44.7 | 11.2 | 22.8 | 26.7 | 8.1  | 11.1 | 13.1 |
| Non-HDL-C≥190 mg/dL, %             | 16.8 | 40.6 | 49.9 | 7.2  | 18.4 | 23.9 | 7.5  | 11.4 | 14.2 |
| Metabolic syndrome, %              | 17.4 | 44.8 | 69.4 | 7.7  | 25.8 | 48.7 | 19.9 | 39.8 | 52.5 |
| CKD, %                             | 0.46 | 1.9  | 4.2  | 28.4 | 31.6 | 44.2 | 7.6  | 16.8 | 23.3 |
| ABI≤0.9, %                         | 3.0  | 4.7  | 10.3 | 2.3  | 5.7  | 14.4 | 1.5  | 6.1  | 9.8  |
| hsCRP≥2 mg/dL, %                   | N/A  | N/A  | N/A  | 46.9 | 54.5 | 64.3 | 45.9 | 52.8 | 55.6 |
| Lp(a)≥50 mg/dL, %                  | N/A  | N/A  | N/A  | 45.7 | 45.5 | 42.9 | 18.0 | 20.6 | 21.6 |
| ApoB≥130 mg/dL, %                  | 6.4  | 18.6 | 25.7 | N/A  | N/A  | N/A  | 17.1 | 23.9 | 23.9 |
| Family history of premature CVD, % | 8.2  | 8.0  | 8.5  | N/A  | N/A  | N/A  | 26.7 | 29.2 | 23.6 |
| CAC>0 Agatston unit, %             | N/A  | N/A  | N/A  | N/A  | N/A  | N/A  | 37.7 | 65.8 | 78.6 |

PCE, pooled cohort equation; No., number; SD, standard deviation; HDL, high density lipoprotein; LDL, low density lipoprotein; SBP, systolic blood pressure; CKD, chronic kidney disease; Lp(a), lipoprotein (a); ApoB, apolipoprotein B; CVD, cardiovascular disease; CAC, coronary artery calcium

**Table S2. Incremental utility of CAC score over the pooled cohort equation across categories of risk enhancer (as defined by the optimum cutpoint of  $\geq 3$  risk enhancers).**

| No of risk enhancers    | PCE alone | PCE+cac | P value for improvement | IDI (p value)  | NRI across 7.5%-20% cutpoints | Category-free NRI (p value) |
|-------------------------|-----------|---------|-------------------------|----------------|-------------------------------|-----------------------------|
| <3 risk enhancers       | 0.757     | 0.770   | 0.01                    | 0.006 (<0.001) | 0.04 (0.05)                   | 0.577 (<0.001)              |
| $\geq 3$ risk enhancers | 0.812     | 0.825   | 0.10                    | 0.009 (0.12)   | -0.028 (0.62)                 | 0.535 (<0.001)              |

**Table S3. Evaluation of risk enhancers in continuous form\***

|                                      | Strength of association           |         | C-statistic |                   |                         | Integrated discrimination | Net reclassification                     |                             |
|--------------------------------------|-----------------------------------|---------|-------------|-------------------|-------------------------|---------------------------|------------------------------------------|-----------------------------|
|                                      | HR per SD                         | P value | PCE alone   | PCE+risk enhancer | P value for improvement | IDI (p value)             | NRI across 7.5%-20% cut-points (p value) | Category-free NRI (p value) |
| Triglyceride                         | 1.03<br>(0.98, 1.08)              | 0.25    | 0.789       | 0.789             | 0.71                    | -0.0001<br>(0.89)         | 0.0003<br>(0.99)                         | 0.013<br>(0.19)             |
| LDL-C                                | 1.00<br>(0.84, 1.12)              | 0.87    | 0.789       | 0.789             | 0.43                    | -0.0002<br>(0.54)         | 0.003<br>(0.18)                          | 0.019<br>(0.20)             |
| GFR                                  | 0.85<br>(0.80, 0.91)              | <0.001  | 0.789       | 0.790             | 0.23                    | 0.0009<br>(0.79)          | 0.001<br>(0.82)                          | 0.051<br>(0.26)             |
| ABI                                  | 0.84<br>(0.81, 0.87)              | <0.001  | 0.789       | 0.792             | 0.01                    | 0.004<br>(0.02)           | 0.018<br>(0.01)                          | -0.004<br>(0.78)            |
| hsCRP (ln) <sup>†</sup>              | 1.09<br>(1.02, 1.16)              | 0.01    | 0.796       | 0.796             | 0.97                    | 0.001<br>(0.04)           | -0.01<br>(0.31)                          | 0.103<br>(0.004)            |
| Lp(a) (ln) <sup>†</sup>              | 1.07<br>(0.99, 1.16)              | 0.06    | 0.796       | 0.798             | 0.04                    | 0.003<br>(0.02)           | 0.02<br>(0.06)                           | 0.124<br>(<0.001)           |
| ApoB                                 | 1.06<br>(0.96, 1.16)              | 0.06    | 0.773       | 0.775             | 0.03                    | 0.001<br>(0.51)           | 0.019<br>(0.02)                          | 0.124<br>(<0.001)           |
| Aggregate risk enhancer <sup>†</sup> | 1.21<br>(1.08-1.37) <sup>††</sup> | 0.001   | 0.762       | 0.763             | 0.40                    | 0.010 (0.004)             | 0.043<br>(0.03)                          | 0.127 (0.01)                |
| CAC (ln+1) <sup>+β</sup>             | 1.56<br>(1.37, 1.77)              | <0.001  | 0.7613      | 0.7822            | 0.001                   | 0.012<br>(0.002)          | 0.096<br>(<0.001)                        | 0.464<br>( <0.001)          |

HR, hazard ratio; SD, standard deviation; LDL-C, low density lipoprotein cholesterol; hsCRP, high sensitivity C-reactive protein; ApoB, Apolipoprotein B; GFR, glomerular filtration rate; Lp(a), lipoprotein (a); ABI, ankle brachial index; CAC, coronary artery calcium; PCE; pooled cohort equation IDI, integrated discrimination index; NRI, net reclassification index

\* Model calibration was optimum ( $p \geq 0.35$ ) across all model (not shown in the table). Non-HDL was not assessed due to collinearity with total cholesterol and HDL in the multivariable model

†hsCRP, Lp(a) and CAC score have skewed distribution. Hence, natural logarithm was used to normalize their distribution prior to analysis

††Hazard ratio represents for each additional significant risk enhancer

<sup>β</sup> There was weak correlation between the CAC score and the number of enhancers (correlation coefficient ( $r$ ) = 0.20,  $p < 0.001$ ). Among all the 6 risk enhancers included in the aggregate score, GFR ( $r = -0.21$ ,  $p < 0.001$ ) was the most strongly correlated with CAC value

**Table S4. Reclassification by aggregate risk enhancer score (in continuous form).**

| PCE alone                        | PCE with combined risk enhancer |             |      |           | Risk reclassification |                |
|----------------------------------|---------------------------------|-------------|------|-----------|-----------------------|----------------|
|                                  | <7.5%                           | 7.5 to <20% | ≥20% | Row total | Higher, No. (%)       | Lower, No. (%) |
| Events (n=305)                   |                                 |             |      |           |                       |                |
| <7.5%                            | 149                             | 16          |      | 165       | 16 (9.7)              | NA             |
| 7.5 to <20%                      | 11                              | 102         | 8    | 121       | 8 (6.6)               | 11 (9.1)       |
| ≥20%                             |                                 | 1           | 18   | 19        | NA                    | 1 (5.3)        |
| Column total                     | 160                             | 119         | 26   | 305       | 24 (7.9)              | 12 (3.9)       |
| Nonevent (n=6,105)               |                                 |             |      |           |                       |                |
| <7.5%                            | 4,970                           | 118         |      | 5,088     | 118 (2.3)             | NA             |
| 7.5 to <20%                      | 139                             | 762         | 22   | 923       | 22 (2.4)              | 139 (15.1)     |
| ≥20%                             |                                 | 22          | 72   | 94        | NA                    | 22 (23.4)      |
| Column total                     | 5,109                           | 902         | 94   | 6,105     | 140 (2.3)             | 161 (2.6)      |
| Net reclassification improvement |                                 |             |      |           |                       |                |
| Overall                          |                                 |             |      |           | 4.3%                  | (p=0.03)       |
| Intermediate group (7.5 to <20%) |                                 |             |      |           | 10.2%                 |                |

PCE, pooled cohort equation; No., number; NA, not applicable

**Table S5. Strength of association between 2018 guideline-recommended risk enhancers after adjusting for the pooled cohort equation (analysis restricted to the ARIC cohort).**

| Risk enhancer                   | HR(95% CI)        | P value |
|---------------------------------|-------------------|---------|
| Triglyceride $\geq$ 175         | 0.90 (0.76, 1.07) | 0.25    |
| LDL-C $\geq$ 160                | 1.19 (0.96, 1.46) | 0.10    |
| Non-HDL $\geq$ 190              | 1.29 (1.01, 1.60) | 0.04    |
| Metabolic syndrome              | 0.93 (0.79, 1.09) | 0.41    |
| HsCRP $\geq$ 2                  | N/A               |         |
| ApoB $\geq$ 130                 | 1.11 (0.98, 1.37) | 0.08    |
| CKD                             | 2.06 (1.43, 2.96) | <0.001  |
| Family history of premature CVD | 1.21 (1.00, 1.53) | 0.05    |
| Lp(a) $\geq$ 50                 | N/A               |         |
| ABI $\leq$ 0.9                  | 1.63 (1.26, 2.12) | <0.001  |
|                                 |                   |         |

HR, hazard ratio; LDL-C, low density lipoprotein cholesterol; non-HDL-C, non-high density lipoprotein cholesterol; hsCRP, high sensitivity C-reactive protein; ApoB, Apolipoprotein B; CKD, chronic kidney disease; Lp(a), lipoprotein (a); ABI, ankle brachial index; CVD, cardiovascular disease; CAC, coronary artery calcium; ARIC, Atherosclerosis Risk in Communities Study



**Table S6. Incremental utility of risk enhancers and CAC score over the pooled cohort equation (analysis restricted to ARIC cohort).**

|                                 | C-statistic |                   |                         | Integrated discrimination | Net reclassification          |
|---------------------------------|-------------|-------------------|-------------------------|---------------------------|-------------------------------|
|                                 | PCE alone   | PCE+risk enhancer | P value for improvement | IDI (p value)             | NRI across 7.5%-20% cutpoints |
| Triglyceride $\geq$ 175 mg/dL   | 0.779       | 0.779             | 0.33                    | -0.0001 (0.95)            | -0.004 (0.36)                 |
| LDL-C $\geq$ 160 mg/dL          | 0.779       | 0.779             | 0.43                    | 0.0003 (0.22)             | -0.002 (0.80)                 |
| Non-HDL-C $\geq$ 190 mg/dL      | 0.779       | 0.780             | 0.08                    | 0.0005 (0.22)             | -0.003 (0.66)                 |
| Metabolic syndrome              | 0.779       | 0.780             | 0.58                    | -0.0001 (0.14)            | 0.002 (0.52)                  |
| CKD                             | 0.779       | 0.780             | 0.16                    | 0.002 (0.02)              | -0.002 (0.78)                 |
| ABI $\leq$ 0.9                  | 0.779       | 0.781             | 0.16                    | 0.002 (0.01)              | 0.008 (0.25)                  |
| hsCRP $\geq$ 2 mg/dL            | N/A         |                   |                         |                           |                               |
| Lp(a) $\geq$ 50 mg/dL           | N/A         |                   |                         |                           |                               |
| ApoB $\geq$ 130 mg/dL           | 0.779       | 0.779             | 0.89                    | 0.0002 (0.87)             | -0.002 (0.58)                 |
| Family history of premature CVD | 0.779       | 0.779             | 0.59                    | 0.0002 (0.31)             | 0.004 (0.51)                  |

HR, hazard ratio; LDL-C, low density lipoprotein cholesterol; non-HDL-C, non-high density lipoprotein cholesterol; hsCRP, high sensitivity C-reactive protein; ApoB, Apolipoprotein B; CKD, chronic kidney disease; Lp(a), lipoprotein (a); ABI, ankle brachial index; CVD, cardiovascular disease; CAC, coronary artery calcium; PCE; pooled cohort equation IDI, integrated discrimination index; NRI, net reclassification index

Figure S1. Sample selection.

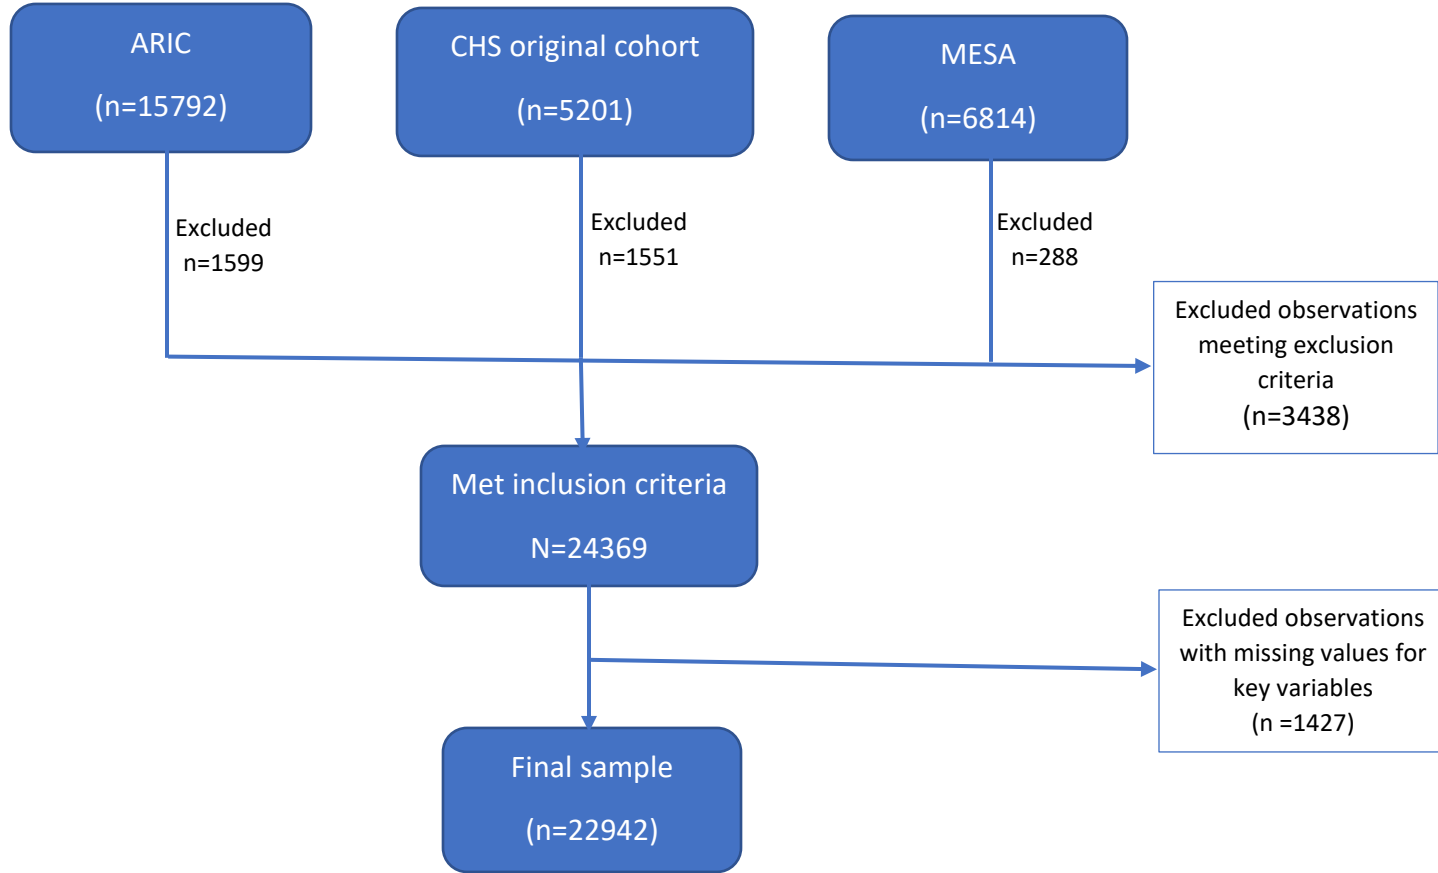

Key variables included variables required for calculation of the pooled cohort equation -- age, sex, race, treated or untreated systolic blood pressure, total cholesterol, high-density lipoprotein cholesterol (HDL-C), current smoking, diabetes—and statin use.

**Figure S2. Distribution of the number of risk enhancers among participants in the Multi-Ethnic Study of Atherosclerosis (MESA).**

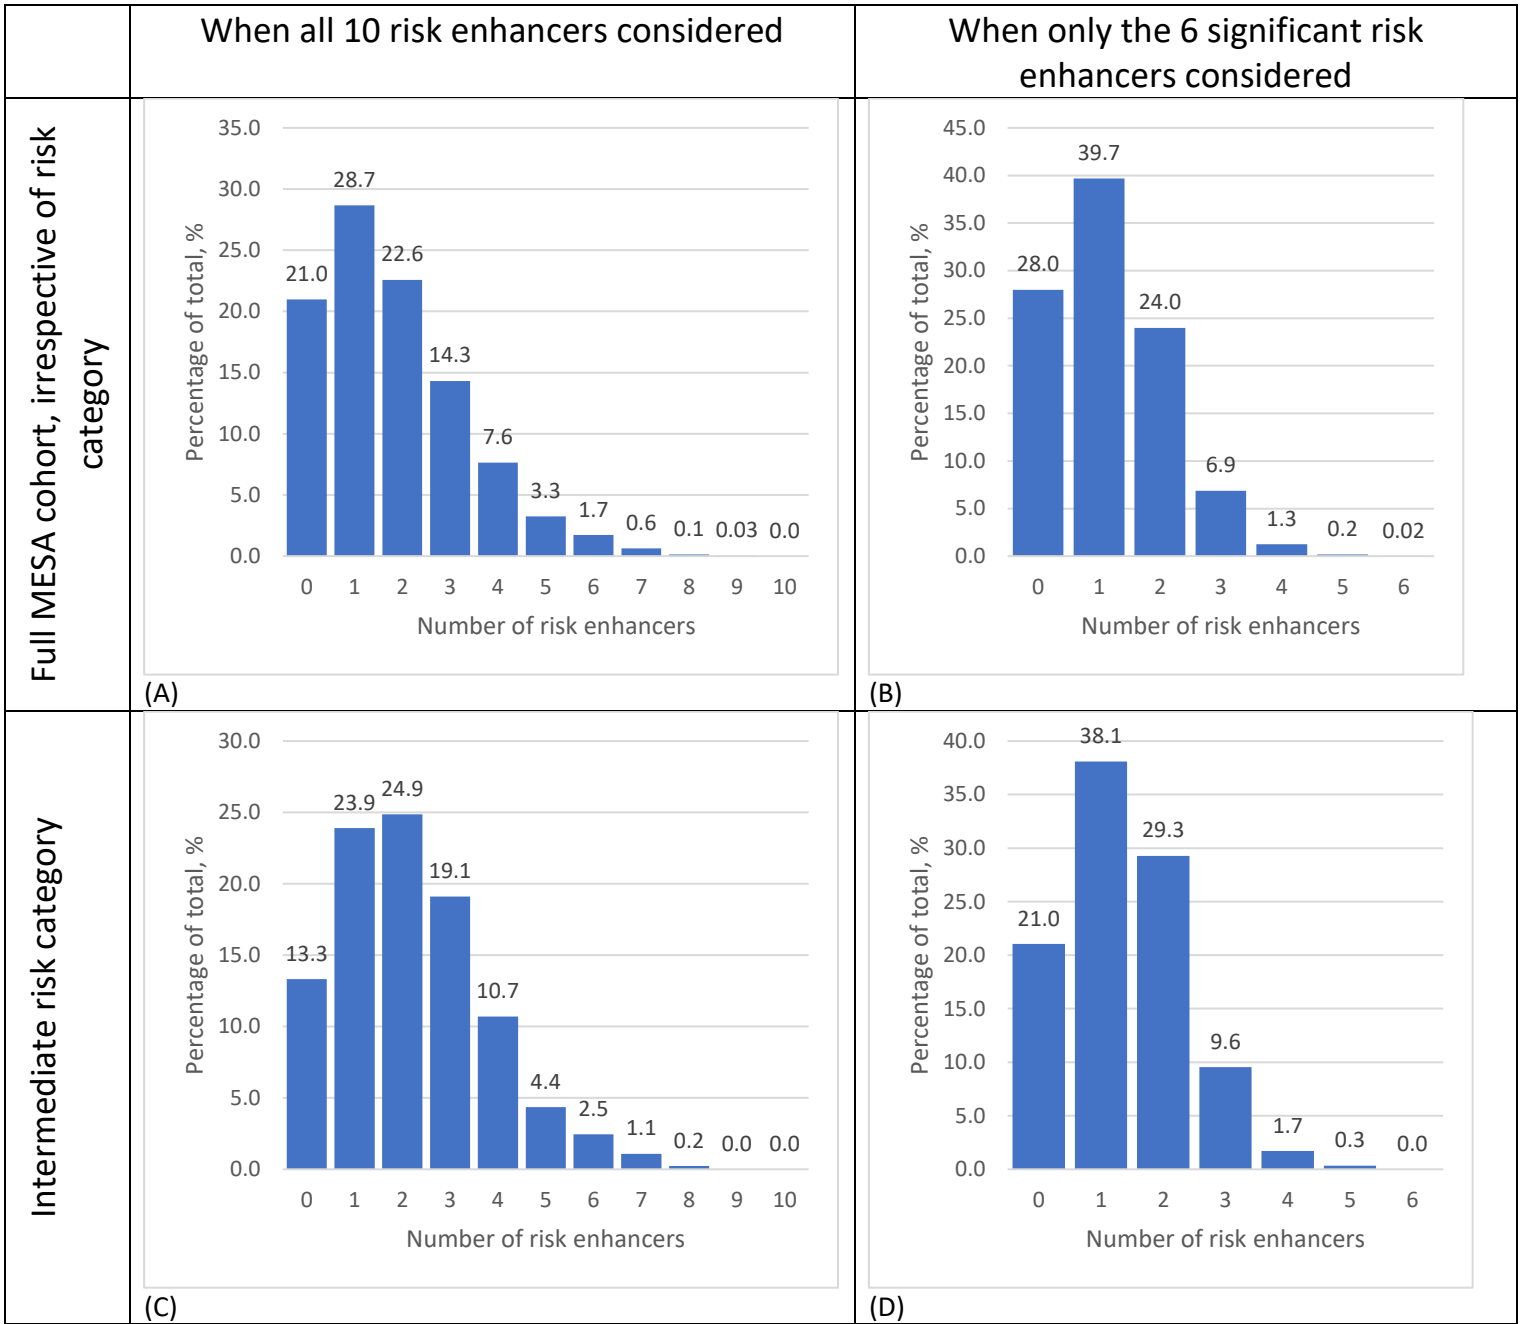

**Figure S3. Rate of incident ASCVD by number of significant risk enhancers (hsCRP  $\geq 2$  mg/L, ApoB  $\geq 130$  mg/dL, CKD, family history of premature CVD, Lp(a)  $\geq 50$  mg/dL, and ABI $<0.9$ ): (A) irrespective of risk category, (B) Among participants with intermediate risk.**

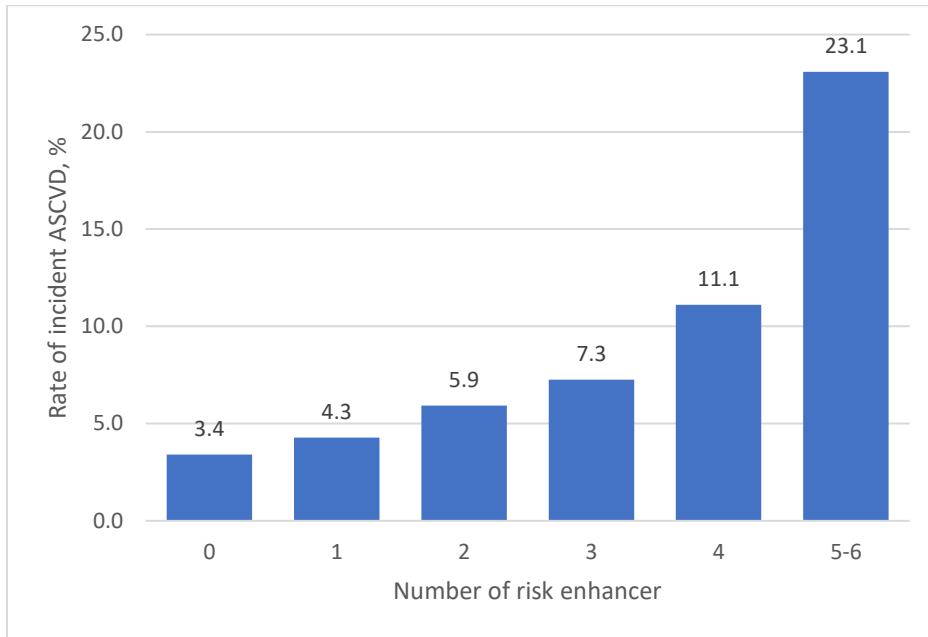

(A)

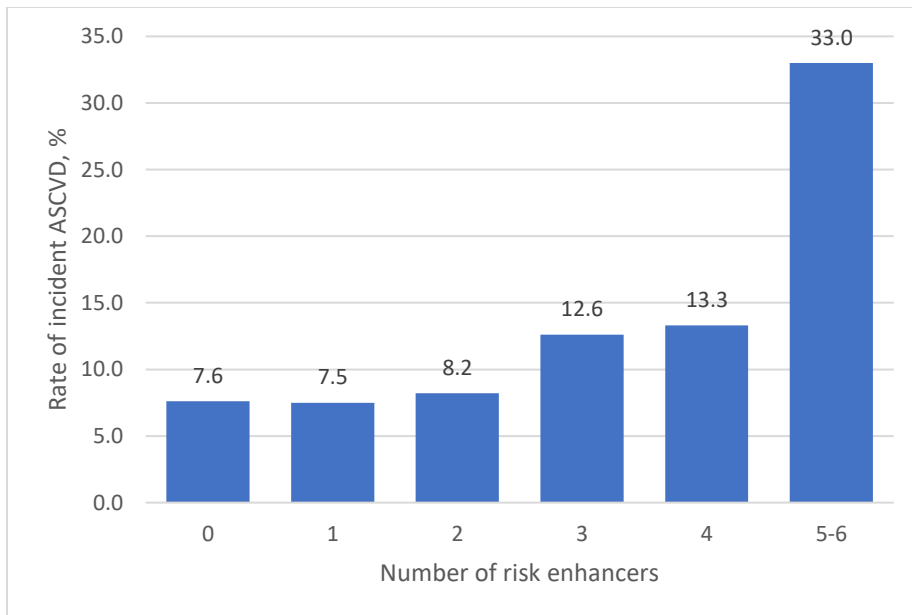

(B)

The group of 5 and 6 risk enhancers was combined due to very few participants with 6 risk enhancers
